# Supplementary material for: Coupling structural characterization with secretomic analysis reveals the mechanism of disruption of the cross-linked structure of bamboo culms
Source: Royal Society of Chemistry journal article supplement (doi:10.1039/d0se00455c), 2020-01-01
Supplement: d0se00455c1.xlsx [file d0se00455c1.xlsx]

## Sheet: Sheet1
Fasta headers	Predicted Function	Proteins	Unique peptides	Sequence coverage [%]	Mol. weight [kDa]	LFQ intensity day 20-1	LFQ intensity day 20-2	LFQ intensity day 20-3	LFQ intensity day 40-1	LFQ intensity day 40-2	LFQ intensity day 40-3	Protein Type	Signal P
>tr|U3M7S8	Laccase	1	5	17.7	55.613	3335400000	3474600000	4252100000	10253000000	15939000000	24309000000	oxidoreductases	Yes
>tr|Q3L2T9	Lignin peroxidase	2	2	12.2	38.495	3546000000	3398000000	3137000000				oxidoreductases	Yes
>tr|Q53WT9	Lignin peroxidase	7	2	28.8	38.439	11639000000	11008000000	10335000000	1642200000	1654000000	1729900000	oxidoreductases	Yes
>tr|B2BF40	Lignin peroxidase (Fragment)	1	1	23	19.798	807190000	984700000	1131000000				oxidoreductases	Yes
>tr|A7U4S3	Lignin peroxidase-like protein (Fragment)	1	2	41.1	22.134	2695200000	3398000000	2346300000				oxidoreductases	Yes
>tr|B2BF37	Manganese peroxidase	1	1	7.7	40.25	2253000000	5544400000	54817000				oxidoreductases	Yes
>tr|B1B554	Manganese peroxidase 1	24	2	10.1	38.236		140150000	54817000				oxidoreductases	Yes
>sp|Q70LM3	Manganese peroxidase 2	53	1	5.9	40.326	2253000000	2103000000	3184700000	2823100000	3770100000	2974300000	oxidoreductases	Yes
>tr|A0A068PCH3	Manganese peroxidase 3	2	1	8.2	40.841	5961000000	5544400000	5476900000	3416700000	2879800000	3889100000	oxidoreductases	Yes
>tr|A7U4P0	Manganese peroxidase-like protein	1	1	15.5	21.334		3139200000	4375800000				oxidoreductases	Yes
>tr|R7SWA7	Alcohol oxidase	5	3	16.4	72.412	1630200000	1632300000	2519500000	558400000	215170000	276930000	oxidoreductases	Yes
>tr|A0A0H2RJ10	Alcohol oxidase	1	1	3.7	72.925		765580000	881970000	711630000	884240000	867550000	oxidoreductases	Yes
>sp|Q01738	Cellobiose dehydrogenase	3	1	1.7	82.006				247120000	294090000	358360000	oxidoreductases	Yes
>tr|Q0ZKA6	Copper radical oxidase	3	2	4.1	81.719	183640000	604350000	620810000				oxidoreductases	Yes
>tr|A0A060SS83	Glyoxal oxidase	9	1	1.5	64.269	285660000	332920000	330060000	247220000	418000000	321420000	oxidoreductases	Yes
>tr|L8WLU8	Aryl-alcohol dehydrogenase	57	2	6.9	44.206	60594000	55501000					oxidoreductases	Yes
>tr|A0A060SUP1	Aryl-alcohol oxidase	1	1	2.5	59.486	20465000	20019000	20713000				oxidoreductases	Yes
>tr|B8PHU4	Candidate aryl-alcohol dehydrogenase	4	1	2.8	43.202				220160000	286310000	191360000	oxidoreductases	Yes
>tr|A0A060T0J0	Glycoside hydrolase family 1, Carbohydrate-Binding Module Family 1 protein	3	1	1.7	76.784	476610000	605180000	711750000	571280000	538860000	455180000	glycoside hydrolases	Yes
>tr|B8PHY5	Carboxylic ester hydrolase	5	1	2.2	68.346	6511500000	8333600000	11014000000	1019400000	797820000	332400000	esterases	Yes
>tr|A0A060SLH8	Carboxylic ester hydrolase	1	1	3	54.473	19586000000	29942000000	25478000000	907350000	901230000	924660000	esterases	Yes
>tr|M2PBC6	Carbohydrate esterase family 15 protein	11	2	7.1	43.934	14994000000	15571000000	17556000000	1886100000	2226500000	2159900000	esterases	Yes
>tr|A0A0C3BCX5	Carbohydrate esterase family 16 protein	4	1	2.2	30.639		13774000	19351000	40260000	98210000	74313000	esterases	Yes
>tr|A0A060SHI5	Carbohydrate Esterase Family 16 protein	8	1	3.7	35.97	62239000	63481000	101560000	75669000	184420000	241850000	esterases	Yes
>tr|K5W5T3	Carbohydrate esterase family 16 protein	2	2	7.5	34.892	1825700000	3526900000	2880000000	4207000000	3111800000	3569900000	esterases	Yes
>tr|L8X1I5	Beta-glucosidase	9	1	2	67.951	43633000	44573000	49308000	79716000	22057000	61012000	glycoside hydrolases	Yes
>sp|Q25BW4	Beta-glucosidase	2	1	2.4	60.664	52340000	60512000	48648000	458960000	440540000	513480000	glycoside hydrolases	Yes
>tr|A0A060SYW5	Glycoside Hydrolase Family 1 protein	4	1	1.7	67.035	35813000	33744000	29607000	168940000	243390000	211160000	glycoside hydrolases	Yes
>tr|A0A0H2RVH4	Beta-xylanase	1	1	3.8	38.408	70442000	76324000	68830000				glycoside hydrolases	Yes
>tr|A0A0C3RVI8	Beta-xylanase	1	1	5.1	41.668	204000000	203740000	214650000	142730000	92154000	123380000	glycoside hydrolases	Yes
>tr|S7PZI8	Beta-xylanase	3	2	7.6	41.8	597660000	624810000	702310000	181920000	148890000	194900000	glycoside hydrolases	Yes
>tr|A0A0C3S726	Beta-xylanase	2	2	6.6	36.562	407570000	379160000	500220000	564350000	739480000	737700000	glycoside hydrolases	Yes
>tr|M2R6Q4	Beta-xylanase	1	1	3.5	42.542		191350000	226710000	814790000	1888900000	1618900000	glycoside hydrolases	Yes
>tr|A0A0C3S735	Endo-1,4-beta-xylanase	2	1	7.5	21.47	44560000	56716000	60981000				glycoside hydrolases	Yes
>sp|Q9HEZ1	Endo-1,4-beta-xylanase A	5	2	5.6	43.57	236790000	473620000	690800000		446670000	370500000	glycoside hydrolases	Yes
>tr|A0A0C3S1B2	Glycoside hydrolase family 115 protein	1	1	1.1	110.41	274080000	1659300000	1695400000	1219400000	789130000	988260000	glycoside hydrolases	Yes
>tr|M2PLP9	Glycoside hydrolase family 115 protein	1	1	1.8	110.74	1471100000	2121600000	2370300000	1790500000	2145900000	2242900000	glycoside hydrolases	Yes
>tr|A0A0C3NRX3	Glycoside hydrolase family 12	2	1	4.6	25.524	23623000	22984000	15554000				glycoside hydrolases	Yes
>tr|S7QIL0	Glycoside hydrolase 13	5	1	6.8	78.227		111250000	92194000	210640000	136760000	220400000	glycoside hydrolases	Yes
>tr|S7RTJ5	Glycoside hydrolase family 13 protein	3	2	1.9	179.17		80100000	84115000	110450000	166030000	107930000	glycoside hydrolases	Yes
>tr|A0A0H2RII2	Glycoside hydrolase family 13 protein	1	2	1.7	180.05	119840000	220390000	212660000	228400000	165320000	189070000	glycoside hydrolases	Yes
>tr|A0A060SM73	Glycoside Hydrolase Family 13 protein	6	1	1.3	178.77		96179000	76605000				glycoside hydrolases	Yes
>tr|A0A0C3SCX9	Glycoside hydrolase family 15 protein	1	1	2.1	80.347	42930000	43960000					glycoside hydrolases	Yes
>tr|M2R4Q1	Glycoside hydrolase family 15 protein	5	2	3.2	78.243		60742000	99463000	218360000	126380000	121080000	glycoside hydrolases	Yes
>tr|A0A0H2SEF7	Glycoside hydrolase 2	1	1	1.9	106.72	309950000	287150000	374040000	140980000	153200000	283490000	glycoside hydrolases	Yes
>tr|S7QGW3	Glycoside hydrolase family 2	8	2	2.9	98.078		240460000	226490000				glycoside hydrolases	Yes
>tr|A0A060SG62	Glycoside Hydrolase Family 2 protein	2	1	1.6	98.979	134860000	211780000	185340000	486950000	573880000	416400000	glycoside hydrolases	Yes
>tr|A0A0C3RSP4	Glycoside hydrolase family 2 protein	4	2	3.4	104.03	499460000	568400000	612820000	685470000	505040000	698130000	glycoside hydrolases	Yes
>tr|W4KCW1	Beta-glucosidase GH3	1	1	3.3	89.163	134890000	125940000	120240000				glycoside hydrolases	Yes
>tr|S7RWB4	Beta-glucosidase GH3	1	1	2.5	91.031	399040000	350490000	262490000				glycoside hydrolases	Yes
>tr|K5W9I5	Beta-glucosidase	1	1	5.5	93.076		205790000	237740000	293740000	287860000	289550000	glycoside hydrolases	Yes
>tr|A0A0H2SCW1	Beta-glucosidase	1	1	2	93.065		108410000	177130000	772980000	479270000	784060000	glycoside hydrolases	Yes
>tr|A0A0C3PWK7	Beta-glucosidase	20	1	4.5	93.166	1479300000	958080000	1004000000	4030600000	4287700000	3772600000	glycoside hydrolases	Yes
>tr|R7RXL8	Glycoside hydrolase 3	1	1	2.9	58.991	28459000	87530000	93220000				glycoside hydrolases	Yes
>tr|A0A067MZ63	Glycoside hydrolase family 3 protein	3	1	2	93.801					526810000		glycoside hydrolases	Yes
>tr|K5UMD6	Glycoside hydrolase family 3 protein	2	1	1.8	81.398	724340000	635420000	721030000				glycoside hydrolases	Yes
>tr|K5UH72	Glycoside hydrolase family 3 protein	1	1	1.5	79.074	186450000	166710000	181540000	350580000	364100000	167170000	glycoside hydrolases	Yes
>tr|K5X922	Glycoside hydrolase family 3 protein	1	1	3.4	76.23	90464000	592100000	546130000	594570000	526810000	578640000	glycoside hydrolases	Yes
>tr|A0A0C3P412	Glycoside hydrolase family 3 protein	6	2	2.2	99.083	269630000	1168000000	1862400000	3316100000	13746000000	13144000000	glycoside hydrolases	Yes
>tr|K5WAS6	Glycoside hydrolase family 31 protein	1	1	2.5	98.363	107540000	130990000	202060000				glycoside hydrolases	Yes
>tr|A0A0C3S998	Glycoside hydrolase family 31 protein	1	1	3.2	87.553	272240000	313970000	291120000				glycoside hydrolases	Yes
>tr|M2R268	Glycoside hydrolase family 31 protein	2	2	4.3	88.755	686760000	754440000	698600000	550690000	100970000	319530000	glycoside hydrolases	Yes
>tr|M2PWN4	Glycoside hydrolase family 31 protein	1	1	0.9	112.38		223080000	202460000	449380000	511320000	574410000	glycoside hydrolases	Yes
>tr|R7S0V0	Beta-galactosidase GH35	1	1	1.2	110.02		14889000	20532000				glycoside hydrolases	Yes
>tr|A0A060SCS4	Glycoside Hydrolase Family 35 protein	8	1	2.4	114.28	470860000	532330000	369930000	13446000			glycoside hydrolases	Yes
>tr|M2QWN1	Glycoside hydrolase family 35 protein	3	2	3.3	116.01		577040000	409020000	983010000	864220000	770270000	glycoside hydrolases	Yes
>tr|A0A0C3NDX1	Glycoside hydrolase family 35 protein	1	1	2.5	105.86	1345800000	1453300000	1781800000	829170000	892280000	868330000	glycoside hydrolases	Yes
>tr|A0A0C3NGQ5	Alpha-mannosidase GH38	3	2	2.9	126.65	70306000	108930000	98991000				glycoside hydrolases	Yes
>tr|K5WG90	alpha-1,2-Mannosidase GH47	28	2	4	60.103	378150000	443280000	444710000	419760000	344440000	365150000	glycoside hydrolases	Yes
>tr|W8QRE4	Beta-xylosidase	1	1	6.3	55.475				76262000	162560000		glycoside hydrolases	Yes
>tr|L8WX57	Exo-beta-1,3-glucanase	10	1	2.4	51.023	65803000	62726000	68193000				glycoside hydrolases	Yes
>tr|A0A0H2SA58	Glycoside hydrolase 5	1	1	7.4	38.277	43474000		52858000				glycoside hydrolases	Yes
>tr|A0A0A1I5P6	Glycoside hydrolase family 5 endoglucanase	1	1	17.3	8.7597	25312000						glycoside hydrolases	Yes
>tr|A0A0C3S346	Glycoside hydrolase family 5 protein	14	1	5	55.11					17992000		glycoside hydrolases	Yes
>tr|A0A060S956	Glycoside Hydrolase Family 5 protein	1	1	10	23.094		58743000	46328000				glycoside hydrolases	Yes
>tr|A0A0D7BVB5	Glycoside hydrolase family 5 protein	1	1	6.3	55.45	1907000000	1862800000	1827300000		17992000	79385000	glycoside hydrolases	Yes
>tr|Q02321	Glucanase GH6	9	2	6.7	48.443	588030000	891450000	743460000	585930000	1559800000	1095600000	glycoside hydrolases	Yes
>tr|A0A0C3ND31	Glycoside hydrolase family 61 protein	1	1	8.5	24.857					44893000	185960000	glycoside hydrolases	Yes
>tr|S7QB33	Glycoside hydrolase 63	1	1	1.6	105.42	407980000	394100000	320980000				glycoside hydrolases	Yes
>tr|S7RUS3	Glycoside hydrolase 63	2	1	2.1	90.652		45626000	59935000				glycoside hydrolases	Yes
>tr|A0A0C3AM68	Glucanase GH7	6	1	1.7	56.287		310530000	301100000	452750000	457600000	408300000	glycoside hydrolases	Yes
>tr|G3FEB8	Glucanase GH7	15	2	15.4	17.185	2748100000	2324000000	2434300000	6032700000	9750900000	13428000000	glycoside hydrolases	Yes
>tr|M2QWB1	Glucanase GH7	1	1	5.8	61.616		47626000	49616000				glycoside hydrolases	Yes
>tr|R7S5A5	Glycoside hydrolase family 79 protein	2	1	2.8	71.002				678960000	275260000		glycoside hydrolases	Yes
>tr|A0A0C3RWQ8	Glycoside hydrolase family 79 protein	1	1	1.8	60.397				727460000	678960000	837610000	glycoside hydrolases	Yes
>tr|K5W0L8	Glycoside hydrolase family 92 protein	1	1	3.9	91.918				275260000	692570000	415910000	glycoside hydrolases	Yes
>tr|R7S8W6	Glycoside hydrolase family 92 protein	1	1	2.2	90.473		115280000	109310000				glycoside hydrolases	Yes
>tr|R7SYB6	Glycoside hydrolase family 92 protein	6	1	4	84.603	102980000	97501000	116280000	275260000	310580000	357780000	glycoside hydrolases	Yes
>tr|A0A0C3SB96	Glycoside hydrolase family 92 protein	2	1	3.5	93.955	1910100000	1891300000	1795600000	1122100000	692570000	524880000	glycoside hydrolases	Yes
>tr|A0A0C3S4B5	Glycoside hydrolase family 92 protein	1	1	2.8	81.815	174530000	137140000	163980000				glycoside hydrolases	Yes
>tr|K5W2Q0	Glycoside hydrolase family 95 protein	1	1	2	97.366	95944000	113880000	128450000	259210000	176110000	186750000	glycoside hydrolases	Yes
>tr|M2RBL9	Glycoside hydrolase family 95 protein	6	1	1.2	99.495		132690000	106040000	285090000	290040000	415910000	glycoside hydrolases	Yes
>tr|A0A0C3RY09	Glycosyltransferase family 20 protein	2	1	1.7	103.36	40699000	26514000	33393000				glycosyl transferases	Yes
>tr|K5V6B1	Glycosyltransferase family 20 protein	2	1	3.7	63.564	98239000	63454000	72012000	45237000	43788000	43627000	glycosyl transferases	Yes
>tr|K5UND3	Glycosyltransferase family 3 protein	1	1	1.8	122.75		120930000		131670000	90668000	68050000	glycosyl transferases	Yes
>tr|A0A0C3PB09	Glycosyltransferase family 3 protein	1	1	4.6	83.627		179090000	213970000	171670000	148970000	173720000	glycosyl transferases	Yes
>tr|A0A0C3SA34	Glycosyltransferase family 39 protein	8	2	3.2	87.515	53874000	83255000	61481000				glycosyl transferases	Yes
>tr|A0A0C3NIW2	Glycosyltransferase family 4 protein	10	3	13	81.114	4226500000	3837700000	3961900000	4193300000	5148700000	3912900000	glycosyl transferases	Yes
>tr|A0A0D7BEN0	Glycosyltransferase family 4 protein	1	1	3.1	81.219	79754000						glycosyl transferases	Yes
>tr|M2R7V9	Glycosyltransferase family 4 protein	1	1	7.4	81.88	301700000	290430000	346520000				glycosyl transferases	Yes
>tr|A0A060S373	Glycosyltransferase Family 66 protein	5	1	1.8	86.483	160600000	179210000	186880000	88690000	153360000	70116000	glycosyl transferases	Yes
>tr|A0A067ML06	Polysaccharide lyase family 4	2	1	1.7	55.235	313400000	360060000	182840000				polysaccharide lyases	Yes
>tr|M2RU97	Polysaccharide lyase family 8 protein	1	1	4	82.964	294540000	294540000					polysaccharide lyases	Yes
>tr|S7QMJ2	Polysaccharide lyase family 8 protein	1	1	1.5	80.176				1335700000	1255700000	1272600000	polysaccharide lyases	Yes
>tr|A0A060SB04	Polysaccharide Lyase Family 8 protein	1	1	3.7	81.444	571400000	670760000	541770000	1391400000	1915200000	2074300000	polysaccharide lyases	Yes
>tr|A0A060S3R1	Alpha-amylase	4	1	2.7	67.479	36787000	22764000	40399000				other proteins	Yes
>tr|A0A0C3NS57	Amine oxidase	5	2	2.8	95.063		62662000	52287000				oxidoreductases	Yes
>tr|S8E9W1	Carboxypeptidase	1	1	4.5	53.796	111000	63840000	24710000				proteases and peptidases	Yes
>tr|M2RRC5	Carboxypeptidase	2	1	2.4	55.413	80111000	163840000	124710000				proteases and peptidases	Yes
>tr|S7RPY4	Carboxypeptidase S	1	1	1.7	60.304	21751000	28608000	30384000				proteases and peptidases	Yes
>tr|S7Q4S2	endo-1,3,1,4-beta-D-glucanase	1	1	5.2	30.054	52059000	52094000					glycoside hydrolases	Yes
>tr|S8FE25	Extracellular GDSL-like lipase/acylhydrolase	1	2	3.1	42.006		1035400000	2591600000	3536400000	4432300000	3124100000	esterases	Yes
>tr|M2RLE9	Pectinesterase	1	2	4.9	39.704		364430000	323140000	448620000	630000000	376810000	esterases	Yes
>tr|K5X534	Peptide hydrolase	2	3	9.7	52.093	1660900000	1560500000	2072600000	837640000	314050000	681760000	proteases and peptidases	Yes
>tr|R7SPY8	Peptide hydrolase	2	2	12.8	51.964	213780000	356320000	221460000				proteases and peptidases	Yes
>tr|S8F268	Proteasome subunit alpha	1	1	8.3	27.434	395840000	436650000	385560000				proteases and peptidases	Yes
>tr|A0A0C3MDA1	Proteasome subunit alpha	1	1	14.5	26.717		171790000	189780000	456270000	413960000	441120000	proteases and peptidases	Yes
>tr|A0A0D7BFL1	Proteasome subunit alpha type	16	2	10	28.051		43915000	34047000	66320000	87328000	64065000	proteases and peptidases	Yes
>tr|A0A0C3S7V3	Proteasome subunit alpha type	10	2	8.9	27.11	365700000	449800000	453660000	905310000	838570000	972870000	proteases and peptidases	Yes
>tr|A0A0C3SDR2	Proteasome subunit alpha type	19	4	16.7	31.261	481120000	444360000	512010000	1079900000	1099100000	987680000	proteases and peptidases	Yes
>tr|A0A0C3S255	Proteasome subunit alpha type	6	3	27	27.048	543700000	449210000	484380000	804770000	1236100000	1492200000	proteases and peptidases	Yes
>tr|A0A0C3S4C7	Proteasome subunit alpha type	20	7	28.5	29.051	1074300000	1488200000	1238800000	2999900000	2911800000	3289100000	proteases and peptidases	Yes
>tr|S7RPR3	Proteasome subunit beta	1	1	6.3	28.112	11915000	11915000					proteases and peptidases	Yes
>tr|A0A0C3S2X7	Proteasome subunit beta type	2	1	7.2	22.88	85686000	73621000					proteases and peptidases	Yes
>tr|A0A0D7B6Z5	Proteasome subunit beta type	4	1	8.8	33.255	48509000	57530000	59717000				proteases and peptidases	Yes
>tr|A0A0C3S188	Proteasome subunit beta type	14	2	11.9	27.892	164480000	281570000	215880000	223810000	75614000	138860000	proteases and peptidases	Yes
>tr|A0A0C3S781	Proteasome subunit beta type	2	1	13.1	33.415	443330000	410420000	354060000	359820000	427680000	569040000	proteases and peptidases	Yes
>tr|M2RJ30	Proteasome subunit beta type	5	1	12.8	34.056	818040000	874730000	1124400000	875160000	537030000	903480000	proteases and peptidases	Yes
>tr|A0A0C3QCC7	Proteasome subunit beta type	14	2	8.8	25.814	682940000	384870000	347490000	895110000	615140000	969960000	proteases and peptidases	Yes
>tr|A0A0H2SIE5	Proteasome subunit beta type	6	2	12.2	30.159	213110000	290740000	365180000				proteases and peptidases	Yes
>tr|S7Q2D3	proteasome subunit P45	2	2	19.5	44.367	118410000	143350000	181840000				proteases and peptidases	Yes
>tr|M2PJ94	Proteasome subunit beta type	1	1	7.2	23.083	218110000	268760000	306600000	264860000	222690000	296240000	proteases and peptidases	Yes
